# Supplementary material for: Clinical Diagnosis for Chikungunya Infection: An Essential Aid in a Primary Care Setting Where Serological Confirmation Is Not Available
Source: Preprints.org preprint supplement (doi:10.20944/preprints202303.0109.v1), 2023-03-06
Supplement: Supplementary file 3 [file supplementary]

**Clinical diagnosis for Chikungunya infection: an essential aid in a primary care setting where serological confirmation is not available**

Juan C. Rueda1,2, Ingris Peláez-Ballestas3, Jose-Ignacio Angarita2, Ana M. Santos2, Carlos Pinzon4, Eugenia-Lucia Saldarriaga2, Jorge M. Rueda5, Elias Forero6, Diego L. Saaibi7, Paula X. Pavía8, Marta Juliana Mantilla2,9, Catalina Villota-Erazo2,9, Juan Camilo Santacruz2,9, Igor Rueda2,9, Mario H. Cardiel10, John Londono2,9*

1Student from the Biosciences Programme, Faculty of Medicine and Engineering, Universidad de La Sabana, Chía, Colombia

2Grupo de Espondiloartropatías, Rheumatology Department, Universidad de La Sabana, Chía, Colombia

3Rheumatology Unit, Hospital General de México “Doctor Eduardo Liceaga”, Mexico City, Mexico

4Departamento de Investigación Clínica, Facultad de Medicina, Universidad de La Sabana, Chía, Colombia

5Rheumatology Unit, Centro Médico Imbanaco, Universidad Libre, Cali, Colombia

6Rheumatology and Internal Medicine Department, Universidad del Norte, Barranquilla, Colombia

7Reumatología Ubit, Centro Médico Carlos Ardila Lulle, Bucaramanga, Colombia

8Unidad de Investigación Científica, Hospital Militar Central, Bogotá, Colombia

9Rheumatology Department, Hospital Militar Central, Bogotá, Colombia

10Centro de Investigación Clínica de Morelia SC, Morelia, Mexico

**Correspondence details:**

Corresponding author:

*John Londono

Address: Km. 7, Autopista Norte de Bogotá, Chía, Cundinamarca, Colombia

Telephone: +571-8615555

**Supplementary tables:**

| Supplementary Table 1. Percentage of most common symptoms in arboviral diseases | | | | |
| --- | --- | --- | --- | --- |
|  | ***DENV*** | ***CHIKV*** | ***ZIKAV*** | ***Reference*** |
| Fever | 93.89 | 92.66 | 69.51 | 1–21 |
| Headache | 73.33 | 64.14 | 72.19 | 1–6,8,10–13,15–21 |
| Rash | 37.00 | 47.03 | 74.03 | 1–6,8–21 |
| G/I symptoms | 49.09 | 37.46 | 28.88 | 1–6,8–21 |
| Myalgia | 73.43 | 61.48 | 65.54 | 1–13,15–20 |
| Fatigue | 12.50 | 43.78 | 40.55 | 4,6,10,11,17,18,20 |
| Arthralgia | 63.79 | 87.14 | 61.55 | 1,2,4–6,8–21 |
| Arthritis/Oedema | 11.50 | 48.36 | 27.80 | 1,3–6,8,10,12,15,20,21 |
| Bleeding | 8.93 | 4.81 | 4.03 | 1,6,11,13,16–19 |
| Red eye | 34.38 | 29.42 | 62.04 | 1,3,5,6,12,14,15,19,20 |
| DENV: Dengue virus; CHIKV: Chikungunya virus; ZIKAV: Zika virus | | | | |

| **Supplementary Table 2.** Statistical differences between symptoms and arboviral diseases | | | |
| --- | --- | --- | --- |
|  | ***DENV-CHIKV*** | ***DENV-ZIKAV*** | ***CHIKV-ZIKAV*** |
| **Fever** |  | < 0.000 | < 0.000 |
| **Headache** |  |  |  |
| **Rash** |  | < 0.000 | < 0.000 |
| **G/I symptoms** |  | 0.0057 |  |
| **Myalgia** |  |  |  |
| **Fatigue** | < 0.000 | < 0.000 |  |
| **Arthralgia** | < 0.000 |  | < 0.000 |
| **Arthritis/Oedema** | < 0.000 | 0.003 | 0.005 |
| **Bleeding** |  |  |  |
| **Red eye** |  | < 0.000 | < 0.000 |
| DENV: Dengue virus; CHIKV: Chikungunya virus; ZIKAV: Zika virus | | | |

| **Supplementary Table 3.** Definitions of diagnostic criteria and screening tools | |
| --- | --- |
|  | ***Definition*** |
| **CHIKV WHO case definition (2015)**22 | Acute clinical case: clinical criterion (fever ≥ 38.5ºC and joint pain usually incapacitating usually accompanied by exanthema, myalgia, back pain, and headache) and epidemiological criterion: resident or visitor in areas with local transmission of CHIKV on the last 15 days |
| **Sissoko CHIKV screening tool (2010)**2 | Incapacitating polyarthralgia and fever of abrupt onset |
| **Thiberville CHIKV screening tool (2013)**17 | Clinical score: fever and arthralgia for less than 48 hours plus: arthralgia of at least 1 MCP, arthralgia of at least 1 wrist and myalgia (probable CHIKV if 3 are present; possible CHIKV if only 2 are present) |
| **Cleton CHIKV screening tool (2015)**23 | Arthralgia combined with rash (both symptoms present are associated with positive test outcome for CHIKV) |
| **Macpherson CHIKV screening tool (2016)**21 | Joint pain and any combination of fever, body pain, or rash (the combination of symptoms that most closely agree with positive CHIKV serology) |
| **ZIKAV WHO case definition (2016)**24 | Suspected case: a person presenting with rash and/or fever and at least one of the following signs or symptoms: arthralgia or arthritis or conjunctivitis (non-purulent/hyperaemic) |
| **Braga ZIKAV screening tool (2017)**8 | Clinical based score to discriminate ZIKAV cases from other febrile or exanthematic illnesses (a score ≥ 7.5 from maculopapular rash = 7, temperature ≤ 37.5ºC = 6, itching = 4.5, anorexia = 2.5, no petechiae = 2, conjunctival hyperaemia = 1) |
| **DENV WHO case definition (2009)**25 | Probable dengue: live in/travel to dengue endemic area. Fever and 2 of the following criteria: nausea or vomiting, rash, aches and pains, tourniquet test positive, leukopenia, any warning sign |
| CHIKV: Chikungunya virus; WHO: World Health Organization; ZIKAV: Zika virus; DENV: Dengue virus | |
